# Supplementary material
Source: HighWire-hosted journal article supplement (https://jpet.aspetjournals.org/highwire/filestream/149265/field_highwire_adjunct_files/0/525SupplFigure.pdf)
Supplement: 525SupplFigure.pdf [file 525SupplFigure.pdf]

## **Supplemental Data**

**Therapeutic assessment of combination therapy with a neprilysin inhibitor and  
angiotensin type 1 receptor antagonist on angiotensin II-induced atherosclerosis,  
abdominal aortic aneurysms, and hypertension**

Yasir AlSiraj\*, Sean E. Thatcher\*, Ching Ling Liang, Heba Ali, Mark Ensor, Lisa A.

Cassis

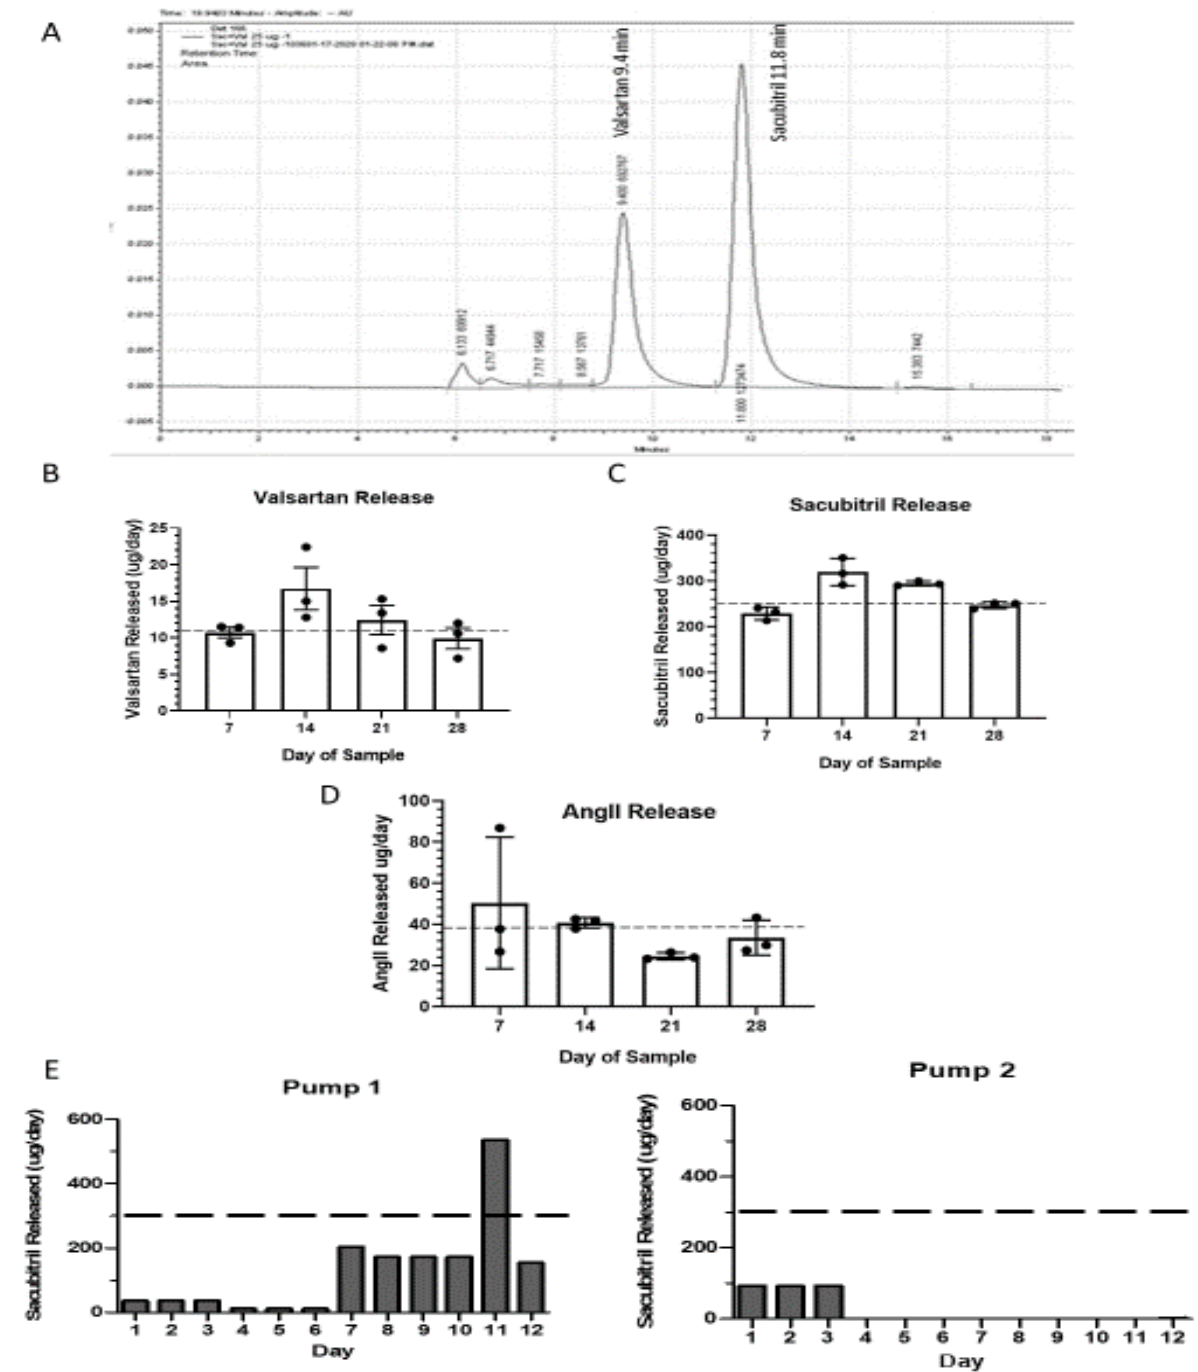

**Supplemental Figure 1.** Characterization of release of valsartan and/or sacubitril in the presence of AngII within osmotic minipumps. A, HPLC chromatogram of sacubitril and valsartan. B, Release rates of valsartan, sacubitril or AngII from osmotic minipumps over a 21 day period. Horizontal dotted lines represent anticipated release rates of each compound. C, Release rates of sacubitril (15 mg/kg/day) from two individual pumps. Horizontal dotted lines represent anticipated sacubitril release rates at the calculated dose. Data are mean  $\pm$  SD with dots representing individual pump release rates.
